# Supplementary material for: LIN28B controls the regenerative capacity of neonatal murine auditory supporting cells through activation of mTOR signaling
Source: bioRxiv or medRxiv preprint supplement (doi:10.1101/2020.05.31.126193), 2020-05-31
Supplement: Supplementary file [file media-1.pdf]

## SUPPLEMENTAL FIGURES

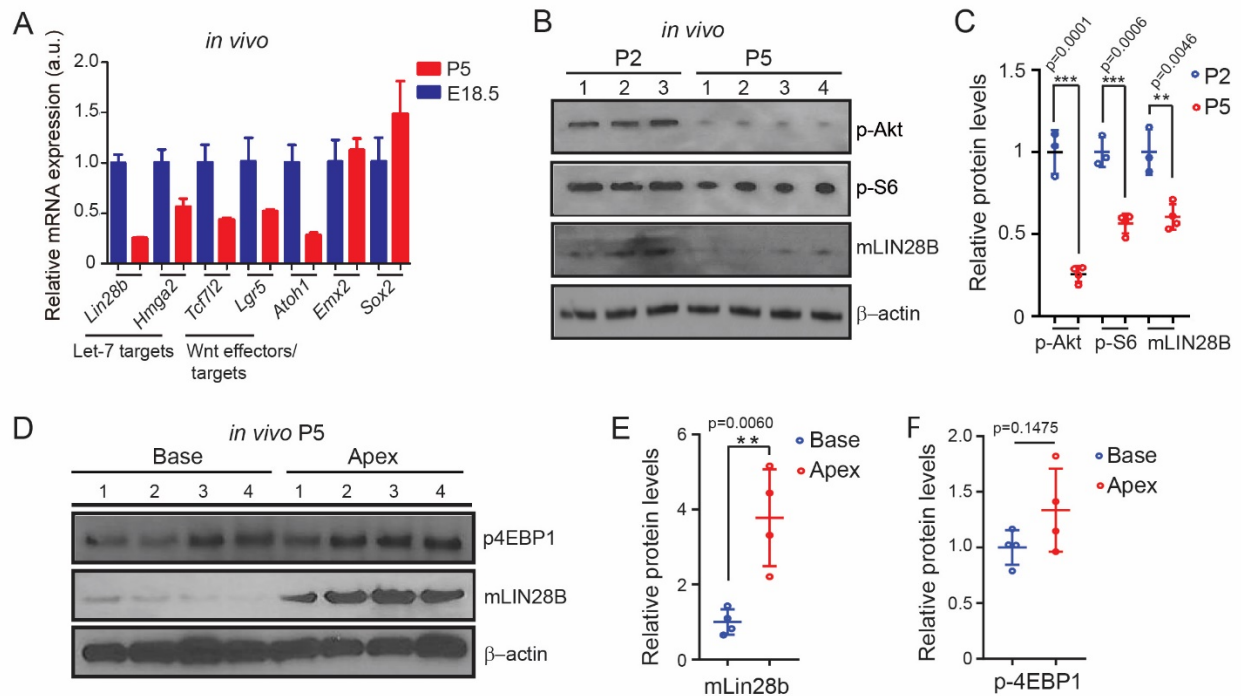

**Fig. S1.** LIN28B expression positively correlates with mTOR activity in the maturing cochlea. (A) RT-qPCR was used to analyze mRNA abundance of *let-7* targets (*Lin28b*, *Hmga2*), Wnt signaling effectors/targets (*Tcf7l2*, *Lgr5*) and *Atoh1*, *Emx2*, *Sox2* in cochlear sensory epithelia obtained from wild type mice stages E18.5 (blue) and P5 (red) (graphed are mean  $\pm$  SD, technical replicate, shown representative experiment, 3 independent experiments). (B) Immunoblots for p-Akt, p-S6, murine (m) LIN28B and  $\beta$ -actin (loading control) using protein lysates of acutely isolated cochlear sensory epithelia from wild type mice stages P2 (n=3) and P5 (n=4). (C) Normalized p-Akt, p-S6 and murine (m) LIN28B protein expression in (B) (n=3 animals for P2 and n=4 mice for P5, from 1 representative experiment, 2 independent experiments). (D) Immunoblots for p-4EBP1, murine (m) LIN28B and  $\beta$ -actin (loading control) using protein lysates of acutely isolated sensory epithelia obtained from the cochlear apex and base of wild type mice stage P5. (E-F) Normalized LIN28B protein levels in (D) (n=4 animals). (F) Normalized p-4EBP1 protein levels in (D) (n=4 animals,

from 1 representative experiment, 2 independent experiments). Graphed are individual data points and mean  $\pm$  SD, 2-tailed, unpaired Student's t-test was used to calculate p-values in (C), (E) and (F). Abbreviation: a.u., arbitrary unit.

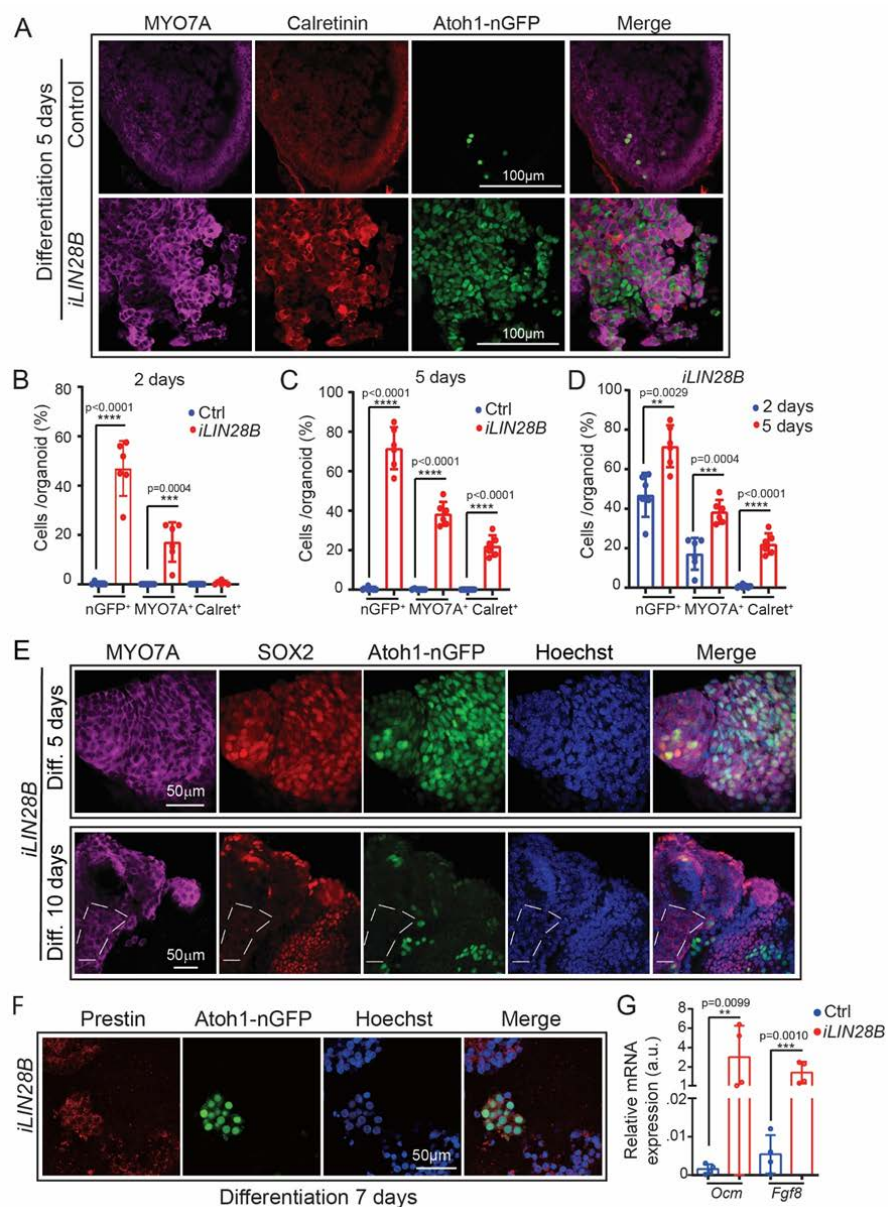

**Fig. S2.** Newly formed hair cells in LIN28B overexpressing organoids express inner and outer hair cell markers. Cochlear organoid cultures were established from stage P5 Atoh1-nGFP *iLIN28B* transgenic mice and Atoh1-nGFP control littermates that lacked the LIN28B transgene

and were cultured as described in Fig. 2 A. 2-tailed, unpaired Student's t-test was used to calculate p-values. Note that the individual data points in (B), (C) (D) and (G) represent the average values per animal. (A) Confocal images of control and LIN28B overexpressing organoids after 2 and 5 days of differentiation. Atoh1-GFP (green) and MYO7A (magenta) marks newly formed hair cells. Calretinin (red) marks presumptive inner hair cells. (B-D) Percentage of Atoh1-nGFP, MYO7A and calretinin positive cells per organoid in control (Ctrl) and LIN28B overexpressing (iLIN28B) organoid cultures after 2 days (B and D), 5 days (C and D) of differentiation (graphed are average values for each animal and their mean  $\pm$  SD, n=6 animals per group, from 2 independent experiments). (E) Confocal images of LIN28B overexpressing organoids after 5 and 10 days of differentiation. Immature hair cells are identified by their co-expression of Atoh1-GFP (green) and MYO7A (magenta) and SOX2 (red). White dashed lines encircle a group of more mature hair cells that express MYO7A but lack SOX2 and Atoh1-GFP expression. Hoechst (blue) labels cell nuclei. (F) Confocal images of control and LIN28B overexpressing organoids after 7 days of differentiation. Atoh1-nGFP (green) and prestin (red) co-expression marks presumptive outer hair cells, Hoechst (blue) labels cell nuclei. (G) RT-PCR of inner (*Fgf8*) and outer (oncomodulin, *Ocm*) hair cell-specific gene expression in control and iLIN28B transgenic organoids after 7 days of differentiation (mean  $\pm$  SD, n=4 animals per group, from 2 independent experiments).

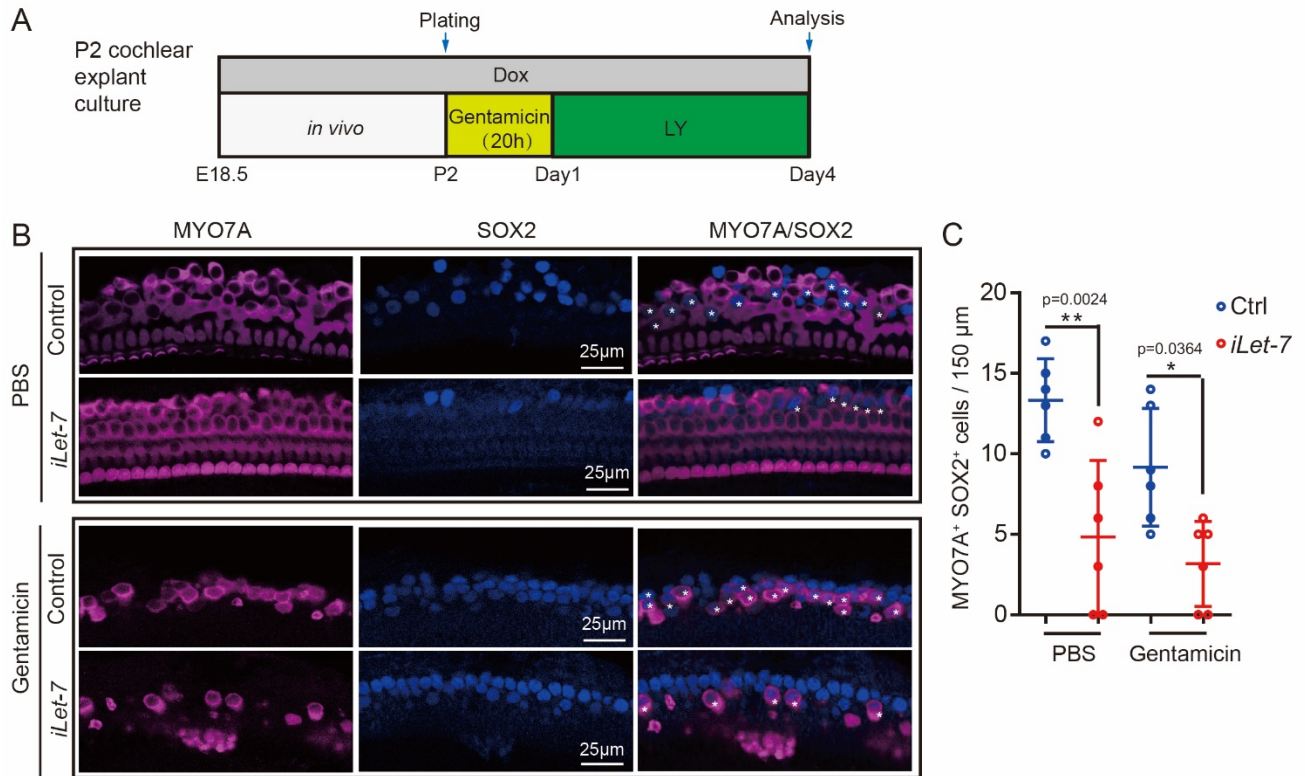

**Fig. S3.** *Let-7* overexpression inhibits hair cell regeneration in early postnatal cochlear explants.

(A) Experimental strategy. Cochlear explant cultures were established from P2 *iLet-7* transgenic pups and littermates that lacked *let-7g* transgene (control). To ablate hair cells, one cochlea from each animal received gentamicin (100 μg/ml), while the other cochlea received PBS (vehicle control) for 20 hours. To induce supporting cell-to-hair cell conversion, all cultures were treated with Notch inhibitor LY411575 for 3 days starting at day 1. (B) Shown are representative confocal images of mid-apical turn of control and *let-7g* overexpressing (*iLet-7*) cochlear explants immunostained for MYO7A (magenta) and SOX2 (blue). Note that new hair cells express MYO7A and SOX2, whereas pre-existing hair cells only express MYO7A. (C) Quantification of newly formed hair cells (MYO7A<sup>+</sup>, SOX2<sup>+</sup>) in control (blue) and *let-7g* overexpressing cochlear explants (red) in (B). Graphed are individual data points, representing average values per animal, and mean ± SD, n=6 mice per group, from 2 independent experiments. 2-way ANOVA with Tukey's correction was used to calculate p-values.

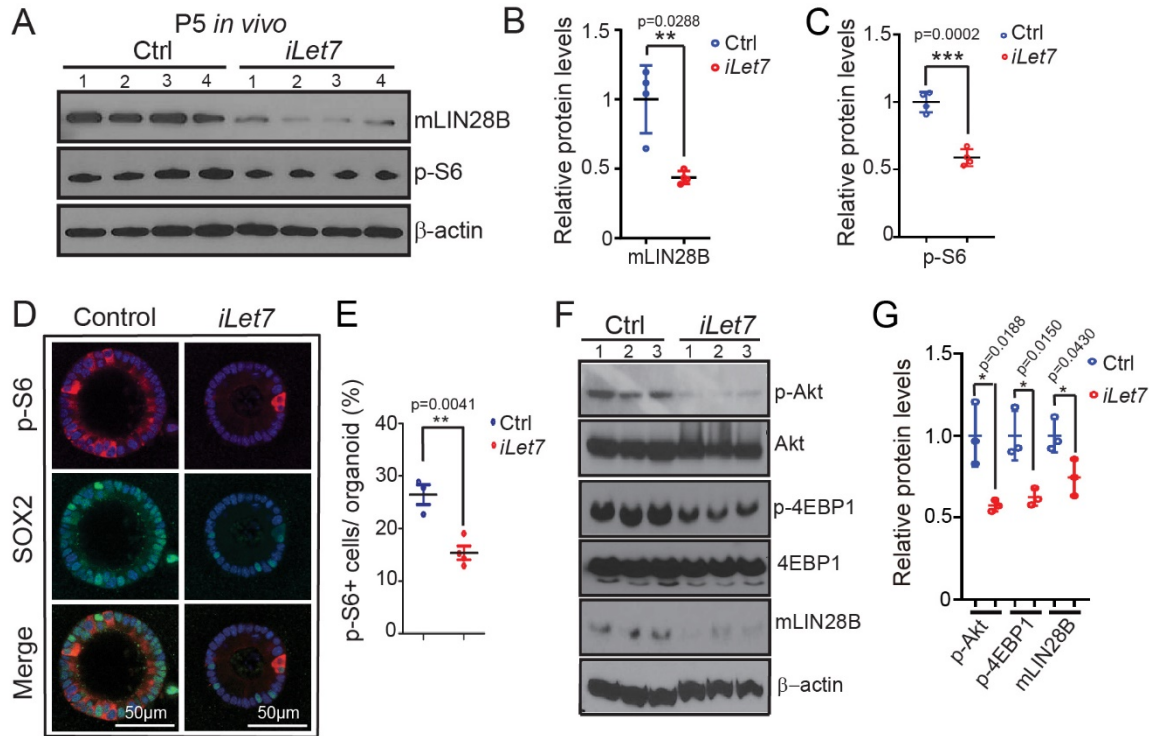

**Fig. S4.** *Let-7g* negatively regulates mTOR signaling in early postnatal cochlear epithelial cells. Graphed are individual data points and mean  $\pm$  SD. 2-tailed, unpaired Student's t-test was used to calculate p-values. Note that the individual data points in (E) represent the average values per animal. (A-C) *Let-7g* overexpression attenuates mTOR signaling in cochlear epithelial cells *in vivo*. *iLet-7* transgenic mice and control littermates that lacked *let-7g* transgene received dox starting at E18.5 until tissue harvest at P5. (A) Immunoblots for p-S6, endogenous murine (m) LIN28B and  $\beta$ -actin using protein lysates of acutely isolated control (ctrl) and *let-7g* (*iLet-7*) overexpressing cochlear sensory epithelia. (B-C) Normalized murine (m) LIN28B protein expression and p-S6 protein in (A) (n=4 animals per group, from 1 representative experiment, 3 independent experiments). (D-G) *Let-7g* overexpression attenuates mTOR signaling in cochlear organoids. Cochlear organoid cultures were established from stage P2 *iLet-7* transgenic mice and control littermates. Dox was present throughout the 10-day long expansion phase. (D) Confocal images of control and *let-7g* overexpressing (*iLet-7*) organoids co-stained for p-S6 (red) and



SOX2 (green). Nuclei were counterstained with Hoechst (blue). (E) Percentage of p-S6+ cells per organoid shown in (D) (n=3 animals in control group and n=4 animals in *iLet-7* group, from 1 experiment). (F) Immunoblots for p-Akt, Akt, p-4EBP1, 4EBP1, murine (m) LIN28B and  $\beta$ -actin using protein lysates from control and *iLet-7* transgenic organoids. (G) Normalized p-Akt, p-4EBP1 and mLIN28B protein expression in (F) (n=3 animals per group, from 1 representative experiment, 3 independent experiments).

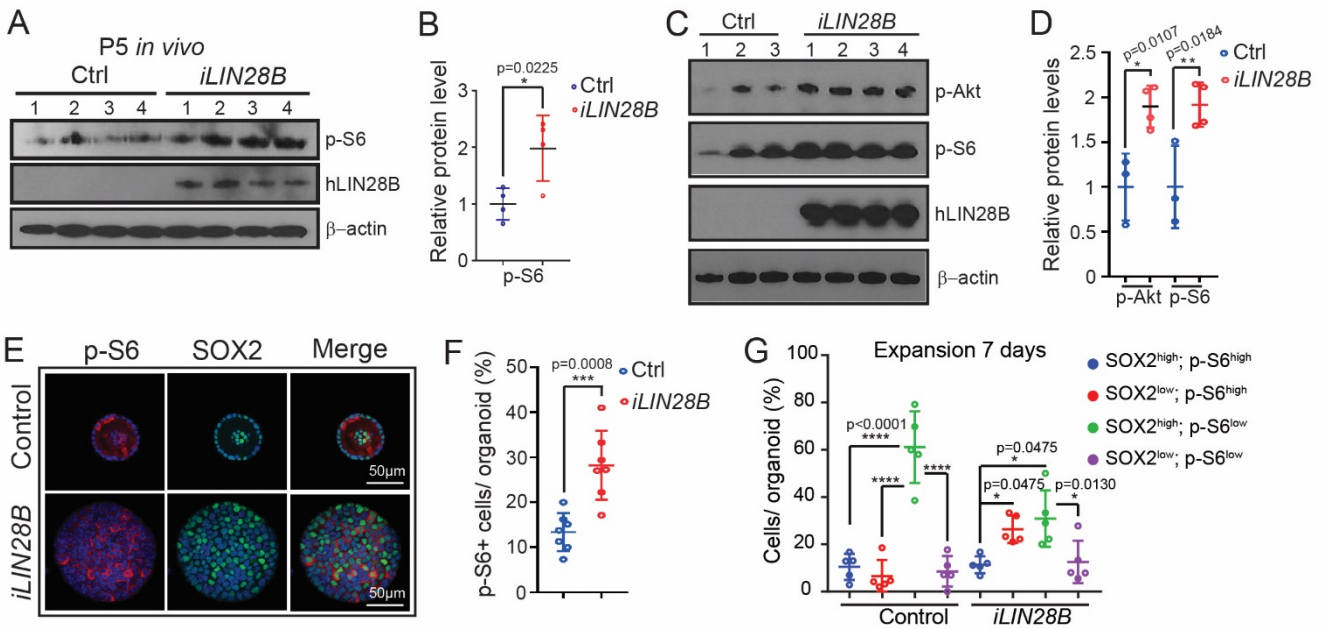

**Fig. S5.** LIN28B positively regulates mTOR signaling in early postnatal cochlear epithelial cells. (A-B) LIN28B overexpression enhances mTOR signaling in cochlear epithelial cells *in vivo*. *iLIN28B* transgenic mice and control littermates received dox starting at E18.5 until tissue harvest at P5 (A) Immunoblots for p-S6, human (h) LIN28B and  $\beta$ -actin using cochlear epithelial protein lysates from stage P5 control and LIN28B overexpressing mice. (B) Normalized p-S6 protein levels in (A) (n=4 animals per group, from 1 representative experiment, 3 independent experiments). (C-G) LIN28B overexpression increases mTOR activity in cochlear organoids. Cochlear organoid cultures were established from stage P5 *iLIN28B* transgenic mice and control littermates. Organoid cultures were maintained as outlined in Fig. 2A. Dox-containing culture

media was replenished every other day. (C) Immunoblots for p-Akt, p-S6, human (h) LIN28B and  $\beta$ -actin using protein lysates of control and iLIN28B organoids. (D) Normalized p-Akt and p-S6 protein levels in (C) (n=3 animals in control group and n=4 animals in iLIN28B group, from 1 representative experiment, 3 independent experiments). (E) Confocal images of P5 control and P5 iLIN28B transgenic organoids after 9 days of expansion. Organoids were immuno-stained for mTOR target p-S6 (red) and supporting cell/pro-sensory cell marker SOX2 (green). Nuclei were counterstained with Hoechst (blue). (F) Percentage of p-S6+ cells per organoid shown in (E) (n=7 animals per group, from 2 independent experiments). (G) Percentage of p-S6+ cells (p-S6-high) that express SOX2 at high or low level in (E) (n=5 animals per group, from 2 independent experiments). Graphed are individual data points and the mean  $\pm$ SD. 2-tailed, unpaired Student's t-test was used to calculate p-values. Note that the individual data points in (F) and (G) represent the average values per animal.

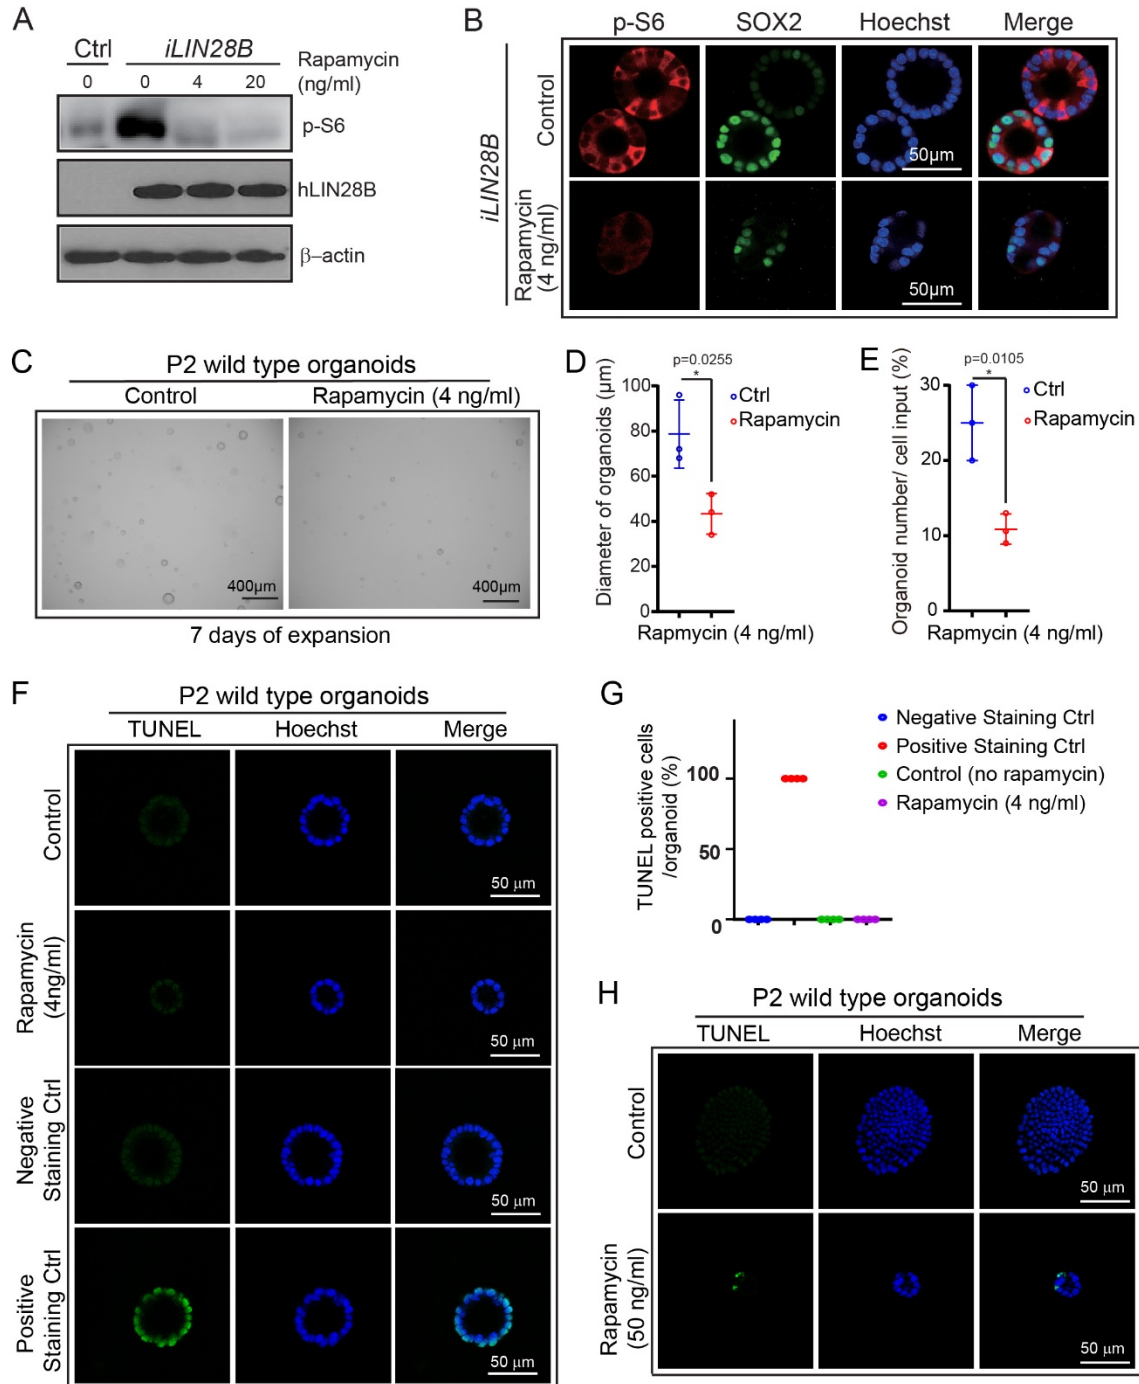

**Fig.S6.** Low dosage of rapamycin inhibits cochlear organoid growth without inducing cell death. (A-B) 4 ng/mL of rapamycin is effective in inhibiting mTOR activity in LIN28B overexpressing cochlear organoids. (A) Western blot of p-S6 and human (h) LIN28B in protein lysates collected from untreated (0 rapamycin) control (Ctrl) and LIN28B overexpressing (*iLIN28B*) organoids and



LIN28B overexpressing organoids that were treated for 5 hours with 4 ng/ml or 20 ng/mL of rapamycin. Note that rapamycin treatment has no effect on LIN28B transgene expression. (B) Confocal images of LIN28B overexpressing organoids treated with 4 ng/mL rapamycin or vehicle control (DMSO) for 7 days. P-S6 (red) immuno-staining marks cells with high mTOR activity, SOX2 (green) marks supporting cells/ pro-sensory cells. Hoechst (blue) marks cell nuclei. (C-H) Cochlear organoid cultures were established from P2 wild type mice and cultured using expansion conditions (see Fig.1 A). (C-G) Cochlear organoids received 4 ng/mL rapamycin or vehicle control (DMSO) at day 1. Organoid growth (C-E) and cell death using TUNEL staining (F-G) was analyzed 6 days later. Graphed are individual data points and mean  $\pm$  SD, 2-tailed, unpaired Student's t-test was used to calculate p-values. (C) Bright field of cochlear organoids treated with 4 ng/mL rapamycin or vehicle control (DMSO). (D) Organoid forming efficiency and (E) organoid diameter in (C) (n=4 animals per group, from 2 independent experiments). (F) Confocal images of TUNEL (green) and Hoechst (blue) stained control (DMSO) and rapamycin (4ng/ml) treated P2 wild type organoids, including negative and positive controls for TUNEL staining. (G) Percentage of TUNEL+ cells in (F) (n=4 animals per group, from 2 independent experiments). Note that the individual data points in (D), (E) and (G) represent the average values per animal. (H) Cochlear organoids were cultured with 50 ng/mL of rapamycin or vehicle control (DMSO) starting at day 3 and cell death using TUNEL staining was analyzed 4 days later. Shown are representative confocal images of TUNEL (green) and Hoechst (blue) stained organoids.

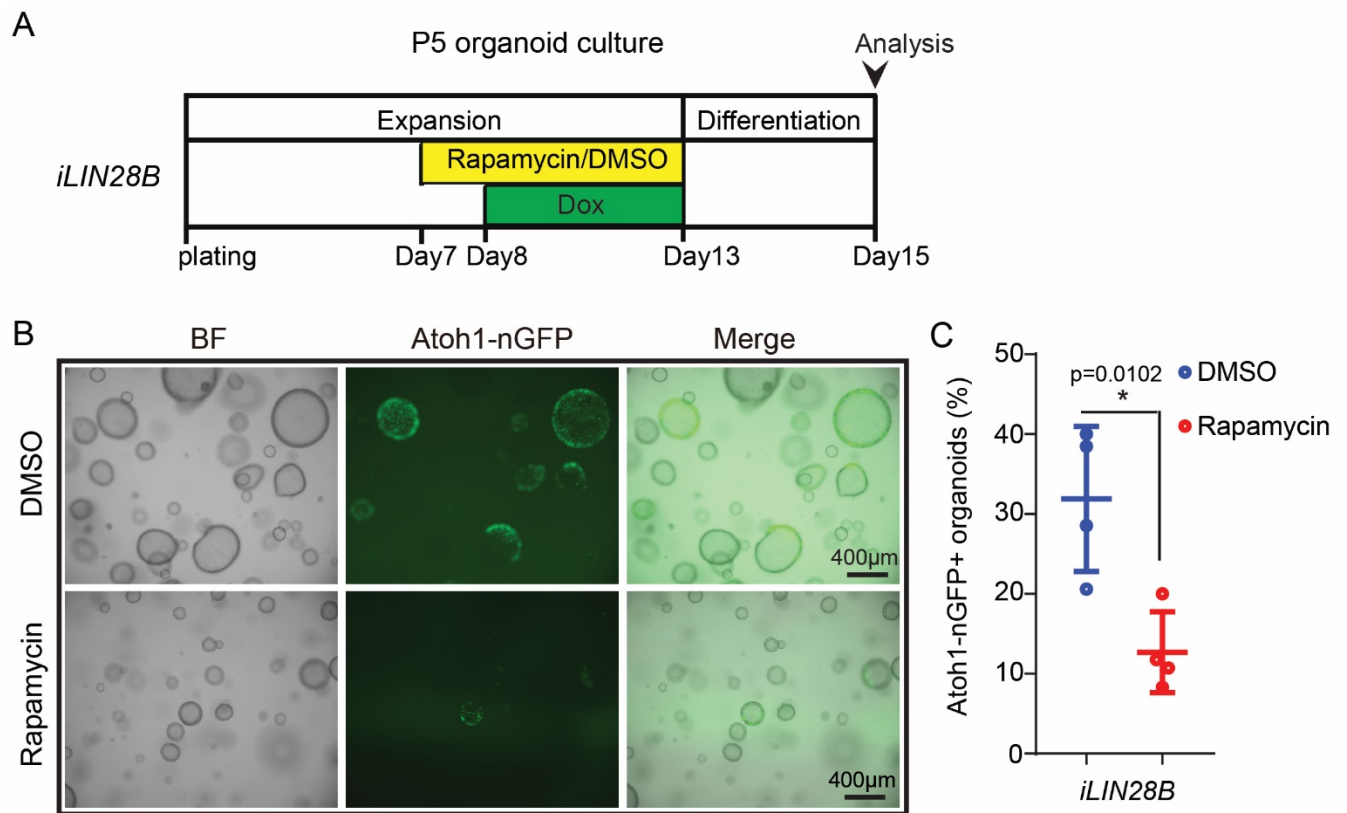

**Fig.S7.** Rapamycin pre-treatment inhibits *Atoh1* induction in LIN28B overexpressing organoids. (A) Experimental strategy. Organoid cultures were established from stage P5 *Atoh1-nGFP* *iLIN28B* transgenic mice and maintained as outlined in Fig.2 A. Rapamycin (4 ng/ml) or vehicle control (DMSO) was added to the culture media at 7 days of expansion. 1 day later, dox was added to induce LIN28B expression. The culture medium was replenished every other day. (B) BF and green fluorescent (*Atoh1-nGFP*) images of LIN28B overexpressing organoids treated with DMSO or rapamycin after 2 days of differentiation. (C) Percentage of *Atoh1-nGFP*+ organoids in (B) (graphed are individual data points and mean  $\pm$  SD, n=4 animals per group, from 2 independent experiments). 2-tailed, unpaired Student's t-test was used to calculate p-values.

## SUPPLEMENTAL METHODS

**Table S1.** List of genotyping primers

| <b>Mouse line</b>                                       | <b>Genotyping primers</b>                                                                                                                               | <b>Product size</b>    |
|---------------------------------------------------------|---------------------------------------------------------------------------------------------------------------------------------------------------------|------------------------|
| <i>Atoh1-GFP,</i><br><i>p27-GFP</i>                     | EGFP1: CGA AGG CTA CGT CCA GGA GCG CAC<br>EGFP2: GCA CGG GGC CGT CGC CGA TGG GGG TGT                                                                    | TG= 300bp              |
| <i>R26-M2rtTA</i>                                       | MTR: GCG AAG AGT TTG TCC TCA ACC<br>F: AAA GTC GCT CTG AGT TGT TAT<br>WTR: GGA GCG GGA GAA ATG GAT ATG                                                  | WT=650bp<br>MT=340bp   |
| <i>Col1A1</i><br>( <i>LIN28B</i> and<br><i>let-7g</i> ) | CoIA: GCA CAG CAT TGC GGA CAT GC<br>CoIB: CCC TCC ATG TGT GAC CAA GG<br>CoIC: GCA GAA GCG CGG CCG TCT GG                                                | WT=300bp<br>TG=450bp   |
| <i>UBC-</i><br><i>CreERT2</i>                           | MT-F: GAC GTC ACC CGT TCT GTT G<br>MT-R: AGG CAA ATT TTG GTG TAC GG<br>WT-F: CTA GGC CAC AGA ATT GAA AGA TCT<br>WT-R: GTA GGT GGA AAT TCT AGC ATC ATC C | WT=324bp<br>TG=475bp   |
| <i>Lin28a floxed</i>                                    | Flox-F: TCC AAC CAG CAG TTT GCA G<br>Flox-R: GCA GCT GGT AAG AAG AAA CCT G                                                                              | WT=356bp<br>Flox=500bp |
| <i>Lin28b floxed</i>                                    | Flox-F: AAC GCA CAT TGC AAA TAC CC<br>Flox-R: TTC ATC TGG CTC CTT TCT CG                                                                                | WT=221bp<br>Flox=338bp |

**Table S2.** List of qPCR primers

| <b>Gene</b> | <b>Forward Primer</b>         | <b>Reveres Primer</b>           |
|-------------|-------------------------------|---------------------------------|
| Ano1        | TTC CCT CTG GCT CCA CTC TTC   | GGC ATC CAG GCG GAT CT          |
| Atoh1       | ATG CAC GGG CTG AAC CA        | TCG TTG TTG AAG GAC GGG ATA     |
| Ccnd1       | CAA GTG TGA CCC GGA CTG C     | TTG ACT CCA GAA GGG CTT CAA     |
| Cybrd1      | AGA CTG CCA TGG ACC TGG AA    | CCG GCA TGG ATG GAT TTC         |
| Emx2        | GAA TCC GCT TTG GCT TTC TG    | GAC ACA AGT CCC GAG AGT TTC C   |
| F2rl1       | CGG ACC GAG AAC CTT GCA CCG   | GTG AGG ATG GAC GCA GAG AACT    |
| Fat3        | CAC AGC CCT TGA ATA CAG TGA   | TGC CTT TGC ATC TCC TTC CT      |
| Fgf8        | ATC AAC GCC ATG GCA GAA G     | AGT ATC GGT CTC CAC AAT GAG CTT |
| Fst         | GAA AAC CTA CCG CAA CGA ATG   | TCC GGC TGC TCT TTG CAT         |
| Hmga2       | CAG AAG AAA GCA GAG ACC ATT   | TTG TTG TGG CCA TTT CCT AGG T   |
| Lgr5        | CCC CAA TGC GTT TTC TAC GT    | GAA GGA CGA CAG GAG ATT GGA T   |
| Lin28a      | TCC AAA GGA GAC AGG TGC TAC A | TTG CAT TCC TTG GCA TGA TG      |
| Lin28b      | CAT GGC ACT GGC CAC TGT AA    | ATC ATG GAG ATG AAT CCG AAT CC  |
| Myo7a       | CCC CCT CTG AGA AGT TCG TTA A | TGT GTC CGA GTT CCG TTG AC      |
| Ocm         | ACC AGA GTG GAT ACC TGG ATG   | CGT CGC TCT GGA ACC TCT GT      |
| Pou4f3      | GCA CCA TCT GCA GGT TCG A     | CCG GCT TGA GAG CGA TCA T       |
| S100a1      | TGG ATG TCC AGA AGG ATG CA    | CCG TTT TCA TCC AGT TCC TTC A   |
| Sox2        | CCA GCG CAT GGA CAG CTA       | GCT GCT CCT GCA TCA TGC T       |
| Tcf7l2      | AAA CCC TCA AGG ATG CTC GTT   | CCA CCG GTA CTT TGT TCG AAA     |
| Trim71      | ATC GGG AGT GTG AGC TGT TG    | GGC GTG AAC ATA ATG CGG TC      |
| Rpl19       | GGT CTG GTT GGA TCC CAA       | TGC CCG GGA ATG GAC AGT CA      |
